# Supplementary material for: Selection and Validation of Reference Genes for Gene Expression Studies in Codonopsis pilosula Based on Transcriptome Sequence Data
Source: PubMed Central journal article supplement (PMC6987187; doi:10.1038/s41598-020-58328-5), 2020-01-28
Supplement: 41598_2020_58328_MOESM1_ESM.pdf [file 41598_2020_58328_MOESM1_ESM.pdf]

Supplementary Information for

**Selection and Validation of Reference Genes for Gene Expression Studies in *Codonopsis pilosula* Based on Transcriptome Sequence Data**

**Lijun Liang<sup>1,2,3</sup>, Zhigui He<sup>4,5</sup>, Haizheng Yu<sup>1,3</sup>, Erhuan Wang<sup>6</sup>, Xiaojiang Zhang<sup>6</sup>, Bingxue Zhang<sup>1,3</sup>, Chenlu Zhang<sup>7</sup> and Zongsuo Liang<sup>1,4,8,\*</sup>**

<sup>1</sup>Institute of soil and water conservation, CAS & MWR, Yangling 712100, P. R. China.

<sup>2</sup>College of Landscape Architecture, Zhejiang Agriculture & Forestry University, Hangzhou 311300, P. R. China.

<sup>3</sup>University of Chinese Academy of Sciences, Beijing 100049, P. R. China.

<sup>4</sup>College of Life Sciences, Northwest A&F University, Yangling 712100, P. R. China.

<sup>5</sup>Institute of Food Science and Biological Engineering, Guilin Tourism University, Guilin 541006, P. R. China.

<sup>6</sup>Buchang Pharmaceuticals Co., Ltd., Xi'an 712000, P. R. China.

<sup>7</sup>School of Biological Science and Engineering, Shaanxi University of Technology, Hanzhong 723000, P. R. China.

<sup>8</sup>College of Life Sciences, Key Laboratory of Plant Secondary Metabolism and Regulation of Zhejiang Province, Zhejiang Sci-Tech University, Hangzhou 310018, P. R. China.

\*Correspondence: [liangzs@ms.iswc.ac.cn](mailto:liangzs@ms.iswc.ac.cn); Tel: +86 0571-86843684

This PDF file includes:

Table S1. The top 50 stably genes selected from *C. pilosula* transcriptome data

Table S1. The top 50 stably genes selected from *C. pilosula* transcriptome data

| Gene symbol | Gene ID                | Length | Gene description                                                                   | ck_TPM  | tr_TPM  | meam_TPM | SD     | CV   | log2FC | Rank |
|-------------|------------------------|--------|------------------------------------------------------------------------------------|---------|---------|----------|--------|------|--------|------|
| ACTB        | TRINITY_DN26124_c2_g1  | 1715   | beta-actin                                                                         | 17.38   | 17.93   | 17.66    | 0.39   | 0.02 | 0.04   | 1    |
| UPL-RHF2A   | TRINITY_DN21607_c0_g5  | 1797   | E3 ubiquitin-protein ligase RHF2A                                                  | 26.40   | 27.41   | 26.91    | 0.71   | 0.03 | 0.05   | 2    |
| UBC32       | TRINITY_DN18331_c0_g1  | 1353   | Ubiquitin-conjugating enzyme E2 32                                                 | 69.65   | 74.14   | 71.90    | 3.17   | 0.04 | 0.09   | 3    |
| EF1a        | TRINITY_DN18635_c0_g3  | 1523   | Elongation factor 1-alpha                                                          | 52.46   | 48.70   | 50.58    | 2.66   | 0.05 | -0.11  | 4    |
| PP2A59y     | TRINITY_DN18767_c2_g2  | 2007   | serine/threonine protein phosphatase 2A 59 kDa regulatory subunit B' gamma isoform | 27.29   | 29.73   | 28.51    | 1.73   | 0.06 | 0.12   | 5    |
| RPL13       | TRINITY_DN23412_c1_g10 | 903    | 60S ribosomal protein L13                                                          | 108.34  | 99.10   | 103.72   | 6.53   | 0.06 | -0.13  | 6    |
| PP2A57b     | TRINITY_DN23680_c1_g1  | 2664   | Serine/threonine protein phosphatase 2A 57 kDa regulatory subunit B' theta isoform | 23.84   | 21.73   | 22.79    | 1.49   | 0.07 | -0.13  | 7    |
| RPL5B       | TRINITY_DN19252_c0_g4  | 1754   | 60S ribosomal protein L5-2                                                         | 153.53  | 139.70  | 146.62   | 9.78   | 0.07 | -0.14  | 8    |
| UBC18       | TRINITY_DN23455_c0_g10 | 1136   | ubiquitin-conjugating enzyme E2 18                                                 | 55.72   | 61.58   | 58.65    | 4.14   | 0.07 | 0.14   | 9    |
| CYP20-1     | TRINITY_DN16482_c0_g3  | 3760   | Peptidyl-prolyl cis-trans isomerase CYP20-1                                        | 48.65   | 54.17   | 51.41    | 3.90   | 0.08 | 0.16   | 10   |
| G6PDH       | TRINITY_DN22563_c0_g2  | 3910   | Glucose-6-phosphate 1-dehydrogenase 4, chloroplast                                 | 5.37    | 6.06    | 5.72     | 0.49   | 0.09 | 0.17   | 11   |
| EIF4A14     | TRINITY_DN19408_c0_g2  | 2466   | Eukaryotic initiation factor 4A-14                                                 | 73.99   | 84.05   | 79.02    | 7.11   | 0.09 | 0.18   | 12   |
| ABCC2       | TRINITY_DN20730_c0_g5  | 2513   | ABC transporter C family member                                                    | 5.37    | 6.15    | 5.76     | 0.55   | 0.10 | 0.20   | 13   |
| GAPDH       | TRINITY_DN16710_c1_g1  | 1856   | NADP-dependent glyceraldehyde-3-phosphate dehydrogenase                            | 59.82   | 68.51   | 64.17    | 6.14   | 0.10 | 0.20   | 14   |
| TUBa3       | TRINITY_DN16768_c1_g2  | 2401   | Tubulin alpha-3 chain                                                              | 98.40   | 112.74  | 105.57   | 10.14  | 0.10 | 0.20   | 15   |
| TUBb2       | TRINITY_DN14966_c4_g4  | 1612   | Tubulin beta-2 chain                                                               | 297.37  | 351.91  | 324.64   | 38.57  | 0.12 | 0.24   | 16   |
| RPL5B       | TRINITY_DN19520_c0_g1  | 1330   | 60S ribosomal protein L5-2                                                         | 229.64  | 189.88  | 209.76   | 28.11  | 0.13 | -0.27  | 17   |
| UPL-RNF170  | TRINITY_DN19225_c3_g2  | 2002   | E3 ubiquitin-protein ligase RNF170                                                 | 8.56    | 10.48   | 9.52     | 1.36   | 0.14 | 0.29   | 18   |
| AP1         | TRINITY_DN17466_c0_g1  | 1900   | AP-1 complex subunit sigma-2                                                       | 21.23   | 26.07   | 23.65    | 3.42   | 0.14 | 0.30   | 19   |
| UBC1        | TRINITY_DN23759_c0_g1  | 1869   | Ubiquitin-conjugating enzyme E2 1                                                  | 254.30  | 312.84  | 283.57   | 41.39  | 0.15 | 0.30   | 20   |
| EF1a        | TRINITY_DN20615_c1_g2  | 2038   | Elongation factor 1-alpha                                                          | 1461.19 | 1826.83 | 1644.01  | 258.55 | 0.16 | 0.32   | 21   |
| UPL-COP1    | TRINITY_DN23695_c1_g2  | 2017   | E3 ubiquitin-protein ligase COP1                                                   | 17.60   | 22.10   | 19.85    | 3.18   | 0.16 | 0.33   | 22   |
| UBC24       | TRINITY_DN16764_c0_g2  | 4634   | ubiquitin-conjugating enzyme E2 24                                                 | 47.95   | 60.28   | 54.12    | 8.72   | 0.16 | 0.33   | 23   |
| ef1A3       | TRINITY_DN23276_c0_g1  | 1774   | Eukaryotic initiation factor 4A-3                                                  | 103.35  | 131.37  | 117.36   | 19.81  | 0.17 | 0.35   | 24   |
| UPL-SINAT3  | TRINITY_DN15783_c0_g1  | 1866   | E3 ubiquitin-protein ligase SINAT3                                                 | 12.78   | 16.28   | 14.53    | 2.47   | 0.17 | 0.35   | 25   |
| TUBb1       | TRINITY_DN20462_c0_g10 | 2352   | Tubulin beta-1 chain                                                               | 65.40   | 51.33   | 58.37    | 9.95   | 0.17 | -0.35  | 26   |
| TUBa3       | TRINITY_DN15107_c1_g2  | 1919   | Tubulin alpha-3 chain                                                              | 902.05  | 704.43  | 803.24   | 139.74 | 0.17 | -0.36  | 27   |
| G6PDH       | TRINITY_DN18566_c0_g2  | 2940   | Glucose-6-phosphate 1-dehydrogenase, cytoplasmic isoform                           | 256.91  | 200.48  | 228.70   | 39.90  | 0.17 | -0.36  | 28   |
| UBC36       | TRINITY_DN23137_c1_g2  | 3393   | Ubiquitin-conjugating enzyme E2 36                                                 | 299.47  | 385.93  | 342.70   | 61.14  | 0.18 | 0.37   | 29   |
| UBC2        | TRINITY_DN17079_c1_g1  | 1062   | Ubiquitin-conjugating enzyme E2 2                                                  | 55.02   | 71.92   | 63.47    | 11.95  | 0.19 | 0.39   | 30   |
| CYP40       | TRINITY_DN22390_c1_g2  | 1810   | Peptidyl-prolyl cis-trans isomerase CYP40                                          | 21.78   | 16.52   | 19.15    | 3.72   | 0.19 | -0.40  | 31   |
| TUBy1       | TRINITY_DN16040_c0_g6  | 2194   | Tubulin gamma-1 chain                                                              | 11.45   | 15.18   | 13.32    | 2.84   | 0.20 | 0.41   | 32   |
| AP4         | TRINITY_DN16652_c0_g3  | 1294   | AP-4 complex subunit sigma                                                         | 35.13   | 46.58   | 40.86    | 8.10   | 0.20 | 0.41   | 33   |
| RPL35A      | TRINITY_DN21806_c0_g4  | 2668   | 60S ribosomal protein L35a-1                                                       | 15.17   | 20.37   | 17.77    | 3.68   | 0.21 | 0.43   | 34   |
| AP3         | TRINITY_DN17237_c2_g2  | 1642   | AP-3 complex subunit sigma                                                         | 14.76   | 10.89   | 12.83    | 2.74   | 0.21 | -0.44  | 35   |
| PP2A57i     | TRINITY_DN18527_c0_g4  | 4699   | Serine/threonine protein phosphatase 2A 57 kDa regulatory subunit B' iota isoform  | 8.95    | 6.60    | 7.78     | 1.66   | 0.21 | -0.44  | 36   |
| UBC7        | TRINITY_DN15587_c0_g2  | 1593   | Ubiquitin-conjugating enzyme E2 7                                                  | 143.51  | 194.62  | 169.07   | 36.14  | 0.21 | 0.44   | 37   |
| TUBa3       | TRINITY_DN16768_c1_g7  | 1731   | Tubulin alpha-3 chain                                                              | 9.40    | 12.97   | 11.19    | 2.52   | 0.23 | 0.46   | 38   |
| UPL-RMA1    | TRINITY_DN16041_c1_g9  | 2677   | E3 ubiquitin-protein ligase RMA1H1                                                 | 91.25   | 126.69  | 108.97   | 25.06  | 0.23 | 0.47   | 39   |
| UBC17       | TRINITY_DN25895_c2_g1  | 1932   | Ubiquitin-conjugating enzyme E2-17                                                 | 454.63  | 633.98  | 544.31   | 126.82 | 0.23 | 0.48   | 40   |
| CYP18-2     | TRINITY_DN24338_c0_g2  | 1835   | Peptidyl-prolyl cis-trans isomerase CYP18-2                                        | 7.28    | 10.28   | 8.78     | 2.12   | 0.24 | 0.50   | 41   |
| AP2         | TRINITY_DN18795_c1_g1  | 1973   | AP-2 complex subunit sigma                                                         | 32.01   | 46.38   | 39.20    | 10.16  | 0.26 | 0.53   | 42   |
| PP2A        | TRINITY_DN17724_c1_g2  | 2618   | Serine/threonine-protein phosphatase PP2A catalytic subunit                        | 59.19   | 66.52   | 72.86    | 19.33  | 0.27 | 0.55   | 43   |
| UBC25       | TRINITY_DN23093_c1_g4  | 2811   | ubiquitin-conjugating enzyme E2 25                                                 | 13.11   | 19.72   | 16.42    | 4.67   | 0.28 | 0.59   | 44   |
| PP2A55b     | TRINITY_DN21666_c1_g5  | 3583   | Serine/threonine protein phosphatase 2A 55 kDa regulatory subunit B beta isoform   | 34.26   | 52.02   | 43.14    | 12.56  | 0.29 | 0.60   | 45   |
| CYP21-1     | TRINITY_DN16353_c0_g1  | 1212   | Peptidyl-prolyl cis-trans isomerase CYP21-1                                        | 12.87   | 20.29   | 16.58    | 5.25   | 0.32 | 0.66   | 46   |
| ABCG24      | TRINITY_DN20277_c0_g3  | 1128   | ABC transporter G family member                                                    | 5.24    | 9.25    | 7.25     | 2.84   | 0.39 | 0.82   | 47   |
| GAPDH       | TRINITY_DN24417_c0_g1  | 2076   | Glyceraldehyde-3-phosphate dehydrogenase, chloroplast                              | 162.40  | 324.78  | 253.59   | 100.68 | 0.40 | 0.83   | 48   |
| AP3M        | TRINITY_DN16765_c0_g6  | 1648   | AP-3 complex subunit mu                                                            | 5.84    | 10.56   | 8.20     | 3.34   | 0.41 | 0.85   | 49   |
| UBC23       | TRINITY_DN23426_c1_g5  | 3537   | ubiquitin-conjugating enzyme E2 23                                                 | 7.56    | 14.22   | 10.89    | 4.71   | 0.43 | 0.91   | 50   |
